# Supplementary material
Source: publisher figshare collection journal article supplement (https://sage.figshare.com/ndownloader/files/13329875)
Supplement: Supplementary file 1 [file 13329875]

| **Supplemental Table 4.** Effect of diet-induced obesity on urinalysis parameters in 32 week old rats - Group incidence and severity. | | | | |
| --- | --- | --- | --- | --- |
| Sex | Females | | Males | |
| Diet  Number of animals | CD  (*n*=24) | HFD  (*n*=21) | CD  (*n*=24) | HFD (*n*=24) |
| **Specific gravity (unitless)** |  |  |  |  |
| 1.005 | 0 (0%) | 2 (10%) | 0 (0%) | 1 (4%) |
| 1.010 | 1 (4%) | 7 (33%) | 3 (13%) | 5 (21%) |
| 1.015 | 10 (42%) | 4 (19%) | 3 (13%) | 3 (13%) |
| 1.020 | 8 (33%) | 4 (19%) | 14 (58%) | 8 (33%) |
| 1.025 | 3 (13%) | 2 (10%) | 4 (17%) | 6 (25%) |
| 1.030 | 2 (8%) | 2 (10%) | 0 (0%) | 1 (4%) |
| ***P*-value** | **0.06** |  | **0.69** |  |
| **pH (unitless)** |  |  |  |  |
| 6.0 | 3 (13%) | 4 (19%) | 0 (0%) | 1 (4%) |
| 6.5 | 1 (4%) | 4 (19%) | 0 (0%) | 8 (33%) |
| 7.0 | 1 (4%) | 8 (38%) | 1 (4%) | 9 (38%) |
| 7.5 | 4 (17%) | 3 (14%) | 0 (0%) | 4 (17%) |
| 8.0 | 3 (13%) | 0 (0%) | 5 (21%) | 1 (4%) |
| 8.5 | 9 (38%) | 2 (10%) | 10 (42%) | 1 (4%) |
| 9.0 | 3 (13%) | 0 (0%) | 8 (33%) | 0 (0%) |
| ***P*-value** | **0.0009** |  | **<0.0001** |  |
| **Protein (g/L)** |  |  |  |  |
| No trace | 17 (71%) | 13 (62%) | 0 (0%) | 3 (13%) |
| Trace | 2 (8%) | 4 (19%) | 4 (17%) | 5 (21%) |
| 0.3 | 4 (17%) | 2 (10%) | 4 (17%) | 6 (25%) |
| 1.0 | 1 (4%) | 1 (5%) | 9 (38%) | 6 (25%) |
| 3.0 | 0 (0%) | 1 (5%) | 7 (29%) | 4 (17%) |
| ***P*-value** | **0.57** |  | **0.06** |  |
| **Leucocytes (cells/µl)** |  |  |  |  |
| No trace | 18 (75%) | 15 (71%) | 1 (4%) | 1 (4%) |
| 15 | 3 (13%) | 3 (14%) | 3 (13%) | 3 (13%) |
| 70 | 3 (13%) | 1 (5%) | 3 (13%) | 10 (42%) |
| 125 | 0 (0%) | 2 (10%) | 6 (25%) | 3 (13%) |
| 500 | 0 (0%) | 0 (0%) | 11 (46%) | 7 (29%) |
| ***P*-value** | **0.55** |  | **0.19** |  |
| **Blood (cells/µl)** |  |  |  |  |
| No trace | 20 (83%) | 20 (95%) | 18 (75%) | 12 (50%) |
| Trace-intact | 1 (4%) | 0 (0%) | 2 (8%) | 3 (13%) |
| Trace-lysed | 0 (0%) | 0 (0%) | 3 (13%) | 8 (33%) |
| 25 | 1 (4%) | 1 (5%) | 0 (0%) | 0 (0%) |
| 80 | 1 (4%) | 0 (0%) | 0 (0%) | 0 (0%) |
| 200 | 1 (4%) | 0 (0%) | 1 (4%) | 1 (4%) |
| ***P*-value** | **0.19** |  | **0.10** |  |
| **Ketones (mmol/L)** |  |  |  |  |
| No trace | 21 (88%) | 21 (100%) | 3 (13%) | 9 (38%) |
| Trace | 3 (13%) | 0 (0%) | 14 (58%) | 13 (54%) |
| 1.5 | 0 (0%) | 0 (0%) | 6 (25%) | 2 (8%) |
| 3.9 | 0 (0%) | 0 (0%) | 1 (4%) | 0 (0%) |
| ***P*-value** | **0.09** |  | **0.01** |  |

Group incidence/severity data expressed as absolute and % values. *P*-values denote CD *vs.* HFD group comparisons as determined by Chi Square Test for trend.
